# Supplementary material for: Effects of Metformin Versus Glipizide on Cardiovascular Outcomes in Patients With Type 2 Diabetes and Coronary Artery Disease
Source: Oxford University Press journal article supplement (doi:10.2337/dc12-0719), 2012-12-10
Supplement: dc120719supplementarydata.pdf [file dc120719supplementarydata.pdf]

SUPPLEMENTARY DATA

**Algorithm for insulin use:** Neutral protamine Hagedorn insulin (NPH, given as Novolin N) was added for patients did not achieve a targeted glucose control level (For both group, the targeted glycated hemoglobin level was <7.0%, the FBG concentration was <7mmol/L, and the PBG concentration was <10mmol/L) after reaching the maximum dose of study drug in either group. The initial insulin dose was 4U and was gradually added on the basis of the morning fasting blood glucose concentration. If the NPH insulin reached 24U and the targeted fasting glucose level still exceed 7mmol/L for one week, then the insulin dose was added and switched to regimens in which the mix of regular and NPH insulin was given twice daily (given as Novolin 30R) at the same time of study drug administration.

**Supplementary Table 1.** Glucose-lowering drugs and dosages at Baseline

| Characteristic               | Baseline             |                      |          |
|------------------------------|----------------------|----------------------|----------|
|                              | Glipizide<br>(N=148) | Metformin<br>(N=156) | P value* |
| Glucose-lowering drug        | no.(%)               | no.(%)               |          |
| Sulfonylurea no.(%)          | 80 (54.1%)           | 76 (48.7%)           | 0.349    |
| Tolbutamide no.(%)           | 1(0.7%)              | 0                    | 0.304    |
| Dosage (g)                   | 1.5                  |                      | NA       |
| Glibenclamide no.(%)         | 1(0.7%)              | 2(1.3%)              | 0.593    |
| Dosage (mg)                  | 7.5                  | 11.3±5.3             | 0.667    |
| Gliquidone no.(%)            | 5(3.4%)              | 6(3.8%)              | 0.620    |
| Dosage (mg)                  | 102±45               | 73±22                | 0.167    |
| Glipizide no.(%)             | 35(23.6%)            | 36(23%)              | 0.459    |
| Dosage (mg)                  | 10.3±6.8             | 9.6±4.4              | 0.587    |
| Gliclazide no.(%)            | 33(22.3%)            | 28(17.9%)            | 0.607    |
| Dosage (mg)                  | 173±68               | 179±70               | 0.773    |
| Glimepiride no.(%)           | 5(3.4%)              | 4(2.6%)              | 0.940    |
| Dosage (mg)                  | 1.4±0.8              | 3.5±1.0              | 0.014    |
| Metformin no.(%)             | 81 (54.7%)           | 74 (47.4%)           | 0.201    |
| Dosage (mg)                  | 1.0±0.4              | 1.1±0.4              | 0.644    |
| Thiazolidinedione no.(%)     | 3 (2.0%)             | 3 (1.9%)             | 0.948    |
| Rosiglitazone no.(%)         | 2(1.3%)              | 3(1.9%)              | 0.695    |
| Dosage (mg)                  | 4±0                  | 4±0                  | NA       |
| Pioglitazone no.(%)          | 1(0.7%)              | 0                    | 0.304    |
| Dosage (mg)                  | 15                   |                      | NA       |
| Acarbose no.(%)              | 30 (20.3%)           | 37 (23.7%)           | 0.469    |
| Dosage (mg)                  | 135±32               | 147±51               | 0.319    |
| Glinide (Repaglinide) no.(%) | 4 (2.7%)             | 5 (3.2%)             | 0.797    |
| Dosage (mg)                  | 2.5±0.8              | 2.8±0.4              | 0.532    |
| Insulin no.(%)               | 15 (10.1%)           | 13 (8.3%)            | 0.586    |
| Dosage (U)                   | 22.3±6.6             | 20.8±7.2             | 0.581    |
| None                         | 24 (16.2%)           | 37 (23.7%)           | 0.103    |

## SUPPLEMENTARY DATA

Data were means  $\pm$  SD for data normally distributed, n (%). Statistical significances were determined using a Student's t-test (for data normally distributed) or a Mann-Whitney test (for data not normally distributed) and  $\chi^2$  test (for data that was categorical variables).

\**P* values are for the difference between the groups at baseline.

**Supplementary Table 2.** Baseline Characteristics of the Patients with primary end points

| Characteristic                                 | Baseline            |                     |                 |
|------------------------------------------------|---------------------|---------------------|-----------------|
|                                                | Glipizide<br>(N=52) | Metformin<br>(N=39) | <i>P</i> value* |
| Age (yr)                                       | 63.0 $\pm$ 9.4      | 62.2 $\pm$ 8.4      | 0.676           |
| Sex — no·(%)                                   |                     |                     | 0.485           |
| Male                                           | 41(78.8%)           | 33(84.6%)           |                 |
| Female                                         | 11(21.2%)           | 6(15.4%)            |                 |
| Time since diagnosis of diabetes (yr)          | 5.0 $\pm$ 4.6       | 5.3 $\pm$ 4.9       | 0.952           |
| Time since diagnosis of CAD (yr)               | 2.8 $\pm$ 5.1       | 2.8 $\pm$ 4.4       | 0.759           |
| History of myocardial infarction — no·(%)      | 33(63.5%)           | 18(46.2%)           | 0.135           |
| History of arterial revascularization — no·(%) | 34(65.4%)           | 25(64.1%)           | 0.899           |
| History of nonfatal stroke — no·(%)            | 7(13.5%)            | 5(12.8%)            | 0.929           |

Data were means  $\pm$  SD for data normally distributed, or n (%). Statistical significances were determined using a Student's t-test (for data normally distributed) or a Mann-Whitney test (for data not normally distributed) and  $\chi^2$  test (for data that was categorical variables).

\**P* values are for the difference between the groups at baseline or at the end of follow-up.

**Supplementary Table 3.** Multivariate Proportional Means Regression Analysis

| Variable             | Hazard Ratio | 95% Confidence Interval |
|----------------------|--------------|-------------------------|
| Medications          |              |                         |
| Glipizide            | 1.00         |                         |
| Metformin            | 0.54         | 0.30 – 0.90             |
| Age                  | 1.03         | 1.00 – 1.06             |
| Male                 | 0.73         | 0.27 – 1.93             |
| Duration of diabetes | 0.98         | 0.86 – 1.08             |
| Duration of CAD      | 0.98         | 0.92 – 1.05             |
| Smoking history      | 1.07         | 0.81 – 1.40             |

SUPPLEMENTARY DATA

Supplementary Figure 1. Mean Daily dose of Insulin per Person Who were Added With Insulin

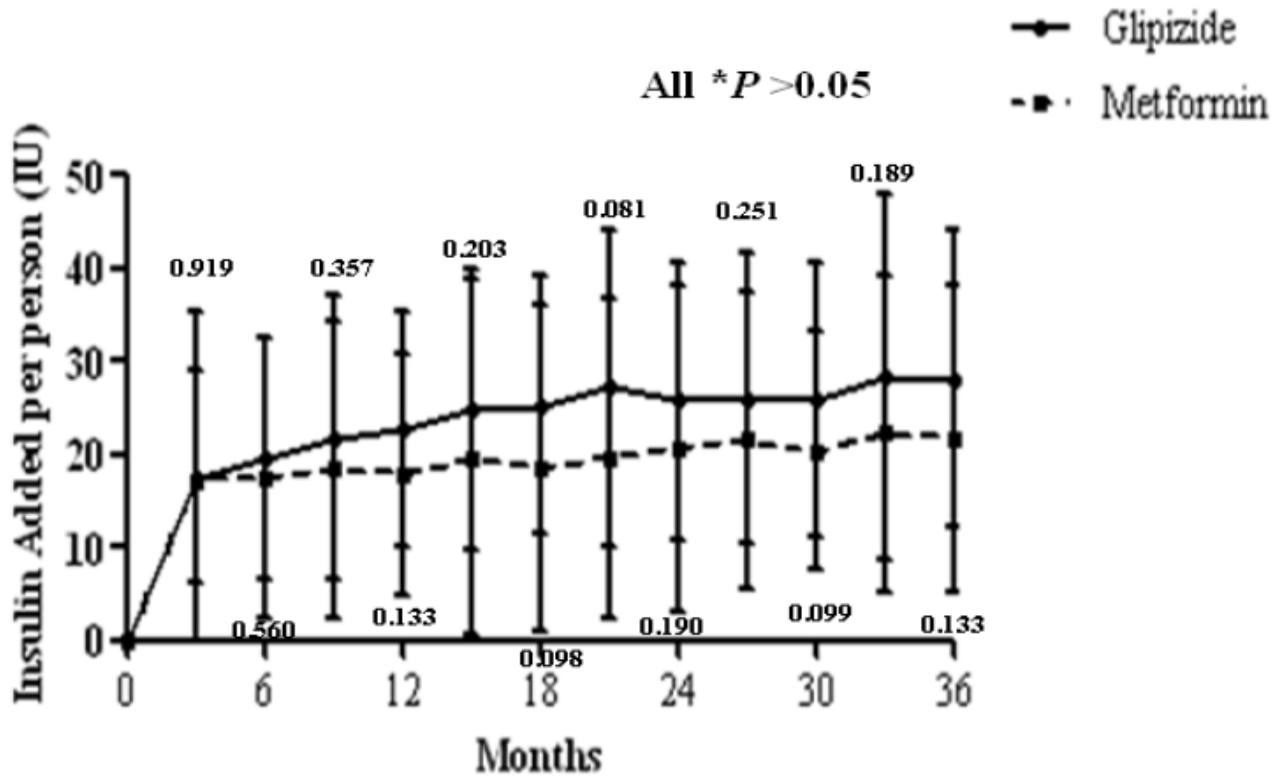

\*  $P$  value refers to comparison between the glipizide and the metformin group at each visit
